# 1 **Somatic uniparental disomy mitigates the most damaging *EFL1* allele** 2 **combination in Schwachman-Diamond syndrome**

3

4 Sangmoon Lee<sup>1,\*15</sup>, Chang Hoon Shin<sup>2,\*15</sup>, Jawon Lee<sup>1</sup>, Seong Dong  
5 Jeong<sup>2</sup>, Che Ry Hong<sup>3</sup>, Jun-Dae Kim<sup>4</sup>, Ah-Ra Kim<sup>5</sup>, Soo Jin Son<sup>6,7</sup>,  
6 Oleksandr Kokhan<sup>8</sup>, Taekyeong Yoo<sup>1</sup>, Jae Sung Ko<sup>3</sup>, Young Bae Sohn<sup>9</sup>, Ok-  
7 Hwa Kim<sup>10</sup>, Jung Min Ko<sup>3</sup>, Tae-Joon Cho<sup>11</sup>, Nathan T. Wright<sup>8</sup>, Je Kyung  
8 Seong<sup>6,7,12</sup>, Suk-Won Jin<sup>4,5</sup>, Hyoung Jin Kang<sup>3,13,\*\*</sup>, Hyeon Ho Kim<sup>2,14,\*\*</sup>,  
9 Murim Choi<sup>1,3,\*\*</sup>

10

11 <sup>1</sup>Department of Biomedical Sciences, Seoul National University College of  
12 Medicine, Seoul, Republic of Korea.

13 <sup>2</sup>Department of Health Sciences and Technology, Samsung Advanced  
14 Institute for Health Sciences and Technology, Sungkyunkwan University,  
15 Seoul, Republic of Korea.

16 <sup>3</sup>Department of Pediatrics, Seoul National University College of Medicine,  
17 Seoul, Republic of Korea.

18 <sup>4</sup>Yale Cardiovascular Research Center, Section of Cardiovascular Medicine,  
19 Department of Internal Medicine, Yale University School of Medicine, New  
20 Haven, CT, USA.

21 <sup>5</sup>School of Life Sciences, Gwangju Institute of Science and Technology,  
22 Gwangju, Republic of Korea.

23 <sup>6</sup>Laboratory of Developmental Biology and Genomics, Research Institute for  
24 Veterinary Science, and BK21 PLUS Program for Creative Veterinary  
25 Science Research, College of Veterinary Medicine, Seoul National  
26 University, Seoul, Republic of Korea.

27 <sup>7</sup>Korea Mouse Phenotyping Center (KMPC), Seoul National University,  
28 Seoul, Republic of Korea.

29 <sup>8</sup>Department of Chemistry and Biochemistry, James Madison University,  
30 Harrisonburg, VA, USA.

31 <sup>9</sup>Department of Medical Genetics, Ajou University Hospital, Ajou University  
32 School of Medicine, Suwon, Republic of Korea.

33 <sup>10</sup>Department of Radiology, Woorisoa Children's Hospital, Seoul, Republic of  
34 Korea.

35 <sup>11</sup>Department of Orthopaedic Surgery, Seoul National University College of  
36 Medicine, Seoul, Republic of Korea.

37 <sup>12</sup>Interdisciplinary Program for Bioinformatics, Program for Cancer Biology  
38 and BIO-MAX/N-Bio Institute, Seoul National University, Seoul, Republic of  
39 Korea.

40 <sup>13</sup>Seoul National University Cancer Research Institute, Seoul, Republic of  
41 Korea.

42 <sup>14</sup>Institute for Future Medicine, Samsung Medical Center, Seoul, Republic of  
43 Korea

44

45 \*S. Lee, and C.H. Shin contributed equally to this paper.

46   \*\* H.J. Kang, H.H.Kim, and M.Choi contributed equally to this paper

47   Correspondence to Murim Choi: murimchoi@snu.ac.kr; or Hyeon Ho Kim:

48   hyeonhkim@skku.edu or Hyoung Jin Kang: kanghj@snu.ac.kr

49

50   <sup>15</sup>Current address: Sangmoon Lee (Department of Neurosciences,

51   University of California, San Diego, La Jolla, CA 92093, USA). Chang Hoon

52   Shin (Laboratory of Genetics and Genomics, National Institute on Aging

53   Intramural Research Program, National Institutes of Health, Baltimore, MD

54   21224, USA).

55

# 56     **Abstract**

57     Shwachman-Diamond syndrome (SDS; OMIM: #260400) is caused by  
58     variants in *SBDS* (Shwachman-Bodian-Diamond syndrome gene), which  
59     encodes a protein that plays an important role in ribosome assembly.  
60     Recent reports suggest that recessive variants in *EFL1* are also responsible  
61     for SDS. However, the precise genetic mechanism that leads to *EFL1*-  
62     induced SDS remains incompletely understood. Here we present three  
63     unrelated Korean SDS patients that carry biallelic pathogenic variants in  
64     *EFL1* with biased allele frequencies, resulting from a bone marrow-specific  
65     somatic uniparental disomy (UPD) in chromosome 15. The recombination  
66     events generated cells that were homozygous for the relatively milder  
67     variant, allowing for the evasion of catastrophic physiological consequences.  
68     Still, the milder *EFL1* variant was solely able to impair 80S ribosome  
69     assembly and induce SDS features in cell line, zebrafish, and mouse  
70     models. The loss of *EFL1* resulted in a pronounced inhibition of terminal  
71     oligo-pyrimidine element-containing ribosomal protein transcript 80S  
72     assembly. Therefore, we propose a more accurate pathogenesis  
73     mechanism of *EFL1* dysfunction that eventually leads to aberrant  
74     translational control and ribosomopathy.

## 75     **Introduction**

76

77     Patients clinically diagnosed with Shwachman-Diamond syndrome (SDS;  
78     OMIM: #260400) present with a constellation of disorders, such as  
79     hematologic manifestations, exocrine pancreatic dysfunction with fatty  
80     infiltration, and skeletal dysplasia that results in short stature<sup>1-3</sup>. The  
81     hematologic manifestations include neutropenia or, less severely,  
82     thrombocytopenia and anemia with a predisposition for myelodysplastic  
83     syndrome and acute myeloid leukemia transformations<sup>4,5</sup>. Variants in *SBDS*  
84     (Shwachman-Bodian-Diamond syndrome gene), which encodes a protein  
85     that plays an important role in ribosome assembly, are mainly responsible  
86     for the disease<sup>1,6-8</sup>. Thus, SDS is considered to be a ribosomopathy, which is  
87     a collective term that is used to describe a group of congenital disorders  
88     caused by problems in ribosome biogenesis, assembly or function<sup>9</sup>.  
89     Moreover, ~10% of clinically diagnosed SDS cases do not contain any  
90     pathogenic *SBDS* variants, suggesting the existence of additional genetic  
91     mechanisms that lead to the disorder<sup>1,6</sup>. Recent reports demonstrate that  
92     variants in genes other than *SBDS*, namely *EFL1*, *DNAJC21*, and *SRP54*,  
93     are implicated with bone marrow failure syndrome and SDS<sup>10-15</sup>.  
94     Homozygous variants of *EFL1* cause an SDS-like syndrome in a recessive  
95     manner, which is highlighted by the observation that three of the seven  
96     reported kindreds underwent consanguineous marriages<sup>10,11,15</sup>. *EFL1*  
97     directly interacts with *SBDS* to release eukaryotic translation initiation factor

98 6 (eIF6) from the 60S ribosomal subunit for 80S ribosomal assembly<sup>7,16</sup>.

99 Thus, it needs to be further investigated whether there is an additional  
100 genetic mechanism that leads to SDS in outbred populations other than  
101 through homozygous pathogenic variants in *EFL1*.

102 As more human genomes with or without clinical significances  
103 continue to be sequenced, it has become clear that variants of unknown  
104 significances (VUS) pose a substantial obstacle in the interpretation of  
105 genotype-phenotype relationships. As many variants are believed to  
106 possess the ability to cause alternations at the molecular level but only with  
107 sub-clinical levels of severity, numerous scenarios that enable VUS to  
108 acquire clinical significances have been postulated. One of these scenarios  
109 involves the assessment of somatically acquired uniparental disomy (UPD)  
110 in the hematopoietic system; although only a small number of instances  
111 have been previously reported. Notable examples include myeloid  
112 neoplasia<sup>17,18</sup>, immunodeficiency<sup>19</sup>, and a single case of sickle cell disease<sup>20</sup>.

113 In this study, we demonstrated a disease-causing mechanism in  
114 patients who inherited compound heterozygous variants in *EFL1*. A mosaic  
115 UPD caused a loss-of-heterozygosity (LOH) in the *EFL1* locus in the bone  
116 marrow and blood, simultaneously homozygosing the less damaging variant  
117 and decreasing the representation of the more damaging variant to avoid  
118 worse hematologic phenotypes. However, this still led to *EFL1* dysfunction  
119 in the bone marrow and resulted in SDS features. We further demonstrated  
120 that the remaining variant by the UPD was a hypomorph and pathogenic, by

121 investigating the molecular mechanism of the EFL1 dysfunction in cell and  
122 animal models. Therefore, searching for a pathogenic variant that was  
123 caused by a non-conventional pathway may increase the probability of  
124 identifying the genetic cause and improve our understanding of the disease  
125 mechanism, and this approach could possibly benefit additional patients  
126 with severe hematological abnormalities.  
127

## 128     **Results**

129

### 130     **Shwachman-Diamond syndrome patients without *SBDS* variants**

131     We recruited three unrelated and non-consanguineous Korean SDS patients  
 132     without plausible recessive mutations in *SBDS* (Fig. 1a; Table S1;  
 133     Supplemental Clinical Narratives). Proband I-1 is a 3-year-old boy who had  
 134     severe intrauterine growth retardation that resulted in a preterm delivery  
 135     (35+3 weeks) and a birth weight of 1.7 kg. He had thrombocytopenia,  
 136     neutropenia, and anemia at 2-months of age. A bone marrow examination  
 137     performed at 6-months of age revealed hypocellularity, reduced  
 138     megakaryocytes, and an increase in iron storage. He also had pancreatic  
 139     lipomatosis, along with an exocrine pancreatic insufficiency, and  
 140     metaphyseal chondrodysplasia (Fig. 1a; Fig. S1). Proband II-1 is a 9-year-  
 141     old female who had severe intrauterine growth retardation that resulted in a  
 142     preterm delivery (36 weeks) and a birth weight of 1.6 kg. She had a diffuse  
 143     fatty infiltration of the pancreas and metaphyseal chondrodysplasia that was  
 144     accompanied by osteopenia and short stature (Fig. 1a). Her sister was  
 145     unaffected. Proband III-1 is a 25-year-old male who did not have any  
 146     perinatal problems except for a low birth weight (40+4 weeks, 2.4 kg). At 2-  
 147     years-old, he had pancreatic exocrine and endocrine insufficiencies,  
 148     thrombocytopenia, anemia, intermittent neutropenia, metaphyseal  
 149     chondrodysplasia, and ichthyosis. Later, he developed osteoporosis,  
 150     hepatomegaly, and a total fatty change of the pancreas (Fig. 1a).



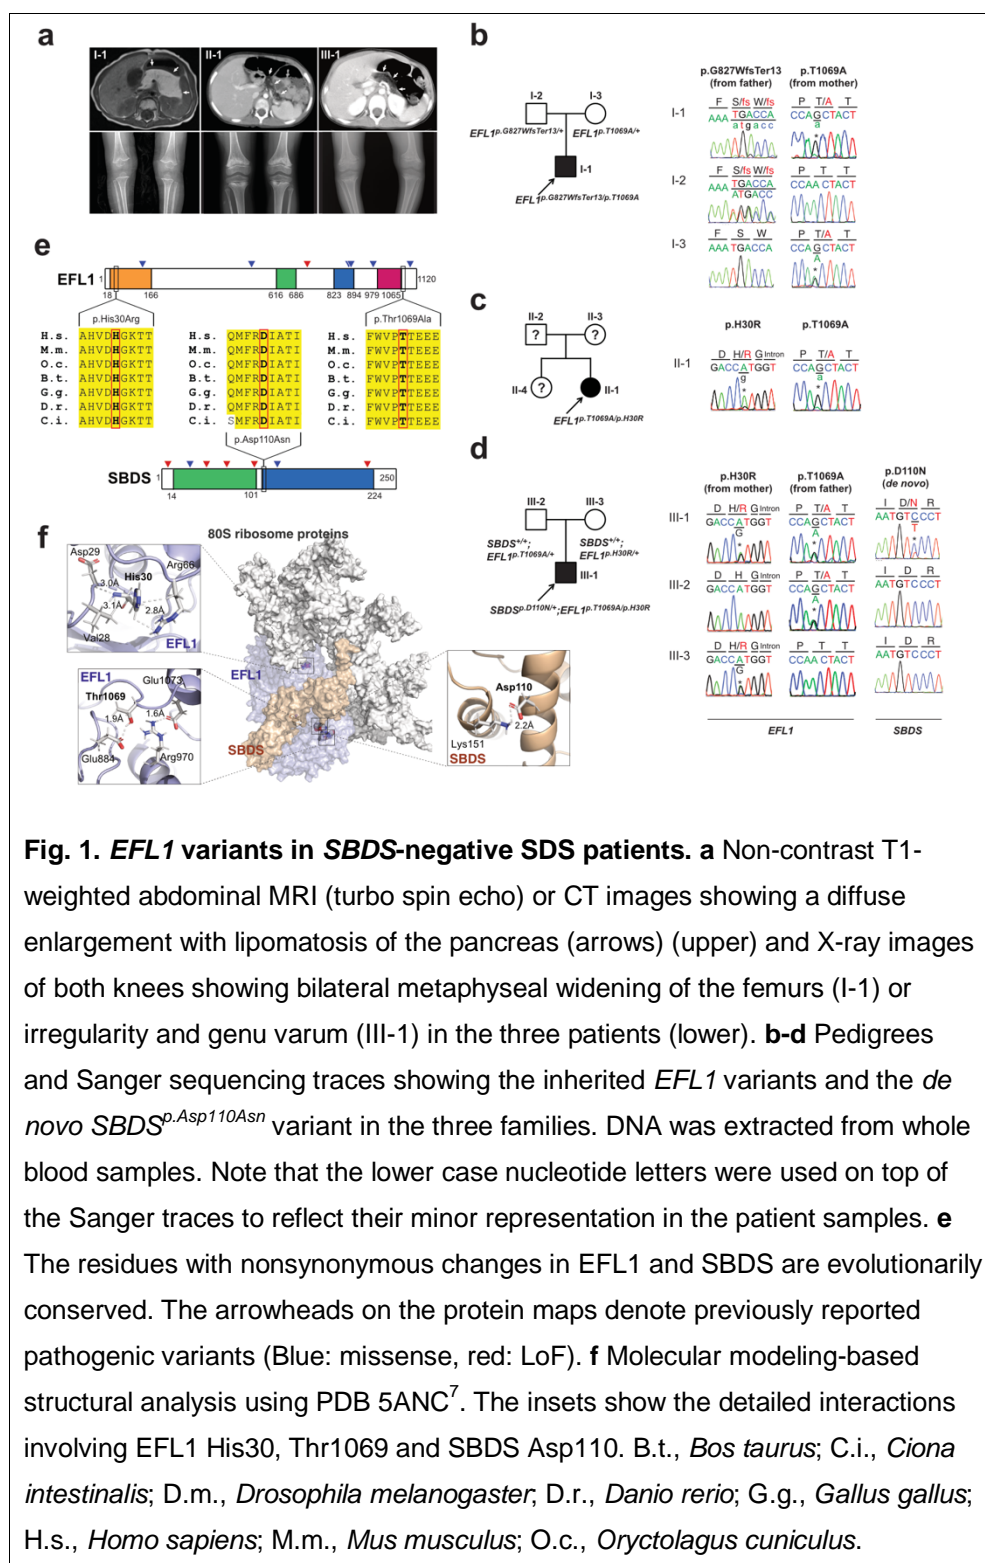

151

## 152 **Identification of mosaic *EFL1* variants**

153 To identify the genetic factors that predisposed the three patients to SDS,  
 154 we exome-sequenced the patients and the available parental DNA was  
 155 extracted from whole blood (Table S2). Notably, the heterozygous  
 156 p.Thr1069Ala variant of *EFL1* (chr15:82,422,872 T>C, hg19,  
 157 NM\_024580.5:c.3205A>G) was identified in all three patients (Fig. 1b-d,  
 158 Table 1; Table S3), which was not previously found in SDS patients. Based  
 159 on gnomAD, it is a low frequency variant that was carried by three  
 160 individuals among 17,972 alleles in the East Asian population (East Asian  
 161 allele frequency (EA-AF) =  $1.7 \times 10^{-4}$ )<sup>21</sup>. Under the assumption that *EFL1*  
 162 variants function in a recessive manner, we sought to ascertain additional  
 163 variants that may pose increased damage to the gene function. Remarkably,  
 164 we found a second variants in *EFL1* in all three patients which were not  
 165 detected by the initial analysis either due to a low number of variant  
 166 supporting reads in the proband or due to a low mapping quality caused by  
 167 the sequence similarity between the *EFL1* and *EFL1P1* loci. Proband I-1  
 168 carried a paternally-originated frameshift variant p.Gly827TrpfsTer13  
 169 (chr15:82,444,316 C>CA, hg19, NM\_024580.5:c.2478dupT, gnomAD EA-  
 170 AF = 0) with a minor allele frequency (MAF) of 8.3%, and Proband II-1 and  
 171 III-1 carried an inherited missense variant p.His30Arg (chr15: 82,554,031  
 172 T>C, hg19, NM\_024580.5:c.89A>G, gnomAD EA-AF =  $5.1 \times 10^{-5}$ ) with  
 173 MAFs of 14.8% and 36.8%, respectively (Table 1). In addition, Proband III-1

174 harbored a heterozygous *SBDS* p.Asn110Asp variant as *de novo* (Fig. 1d;  
175 Fig. S2), which is never seen in the control databases. Then we noted that  
176 the non-reference allele of *EFL1* p.Thr1069Ala for I-1 and II-1 was  
177 dominantly covered compared to the reference allele (Table 1), which  
178 caused it to function like an incomplete homozygous variant, while the ratio  
179 was comparable in III-1 (Fig. 1c; Table 1). All the *EFL1* variants were equally  
180 represented in the parental carriers. The patients did not carry any variant in  
181 other SDS-associated genes, including *DNAJC21* and *SRP54* (data not  
182 shown). The two *EFL1* amino acid residues harboring the missense variants  
183 (His30 and Thr1069) are highly conserved throughout evolution and are  
184 predicted to be pathogenic (Fig. 1e; Table S4). The protein structure  
185 analysis suggested that the His30 and Thr1069 residues form hydrogen  
186 bonds with neighboring residues, which would presumably confer stability to  
187 the protein structure. Notably, previously reported pathogenic residues  
188 Cys883 and Arg970 lie close to Thr1069 (Fig. 1f; Fig. S3)<sup>15</sup>. The *SBDS*  
189 Asn110 residue is also conserved among the vertebrate species (Fig. 1e;  
190 Table S4) and is expected to interact with neighboring amino acids,  
191 including Lys151 (Fig. 1f).

192 To understand the genetic cause of this observation, we  
193 investigated whether large-scale structural variants exist that encompass  
194 the region. Indeed, all the patients carried a partial LOH in chromosome 15,  
195 where *EFL1* resides (Fig. 2a; Figs. S4 and S5). This LOH was copy-neutral  
196 and was not seen in the healthy parents (Fig. S6), suggesting that it was

caused by a somatic UPD. This LOH of the *EFL1* locus is not frequently found in healthy Korean individuals ( $1/3,667 = 2.7 \times 10^{-4}$ , Fig. S7). Also, according to a survey of hematopoietic chromosomal mosaicism events, 117 of 151,202 apparently normal individuals carry a copy-neutral LOH or a copy-number deletion of the *EFL1* locus ( $7.7 \times 10^{-4}$ )<sup>22</sup>. Thus, the LOH of the *EFL1* locus is a rare event. The sizes of the LOH intervals were variable among the patients (100%, 100% and 27.8% of the entire chromosome span, respectively; Fig. 2a). We also sought to identify the haplotype origins of the variants that the probands carried and observed that the chromosomes that were dominantly represented (*i.e.*, the maternal chromosome for I-1 and the paternal chromosome for III-1) harbored *EFL1*<sup>p.Thr1069Ala</sup>, which was consistent with their higher coverage ratios compared to other variants as documented in the WES analysis (Fig. 2a). To test if the UPD event occurred in a mosaic pattern and whether LOH-carrying and non-LOH-carrying cells co-exist, a single-cell SNP microarray experiment was performed using bone marrow (I-1) or epithelial cells from buccal swabs (III-1). As expected, complete LOHs in chromosome 15 were observed in a subset of the cells, confirming the mosaic UPD events that preferentially selected *EFL1*<sup>p.Thr1069Ala</sup> over the other variants (*i.e.*, *EFL1*<sup>p.Gly827TrpfsTer13</sup> and *EFL1*<sup>p.His30Arg</sup>; Fig. 2b-d; Fig. S8). Therefore, cells containing UPD of chromosome 15 are expected to be homozygous for the *EFL1*<sup>p.Thr1069Ala</sup> allele and be a homozygous reference for the other two

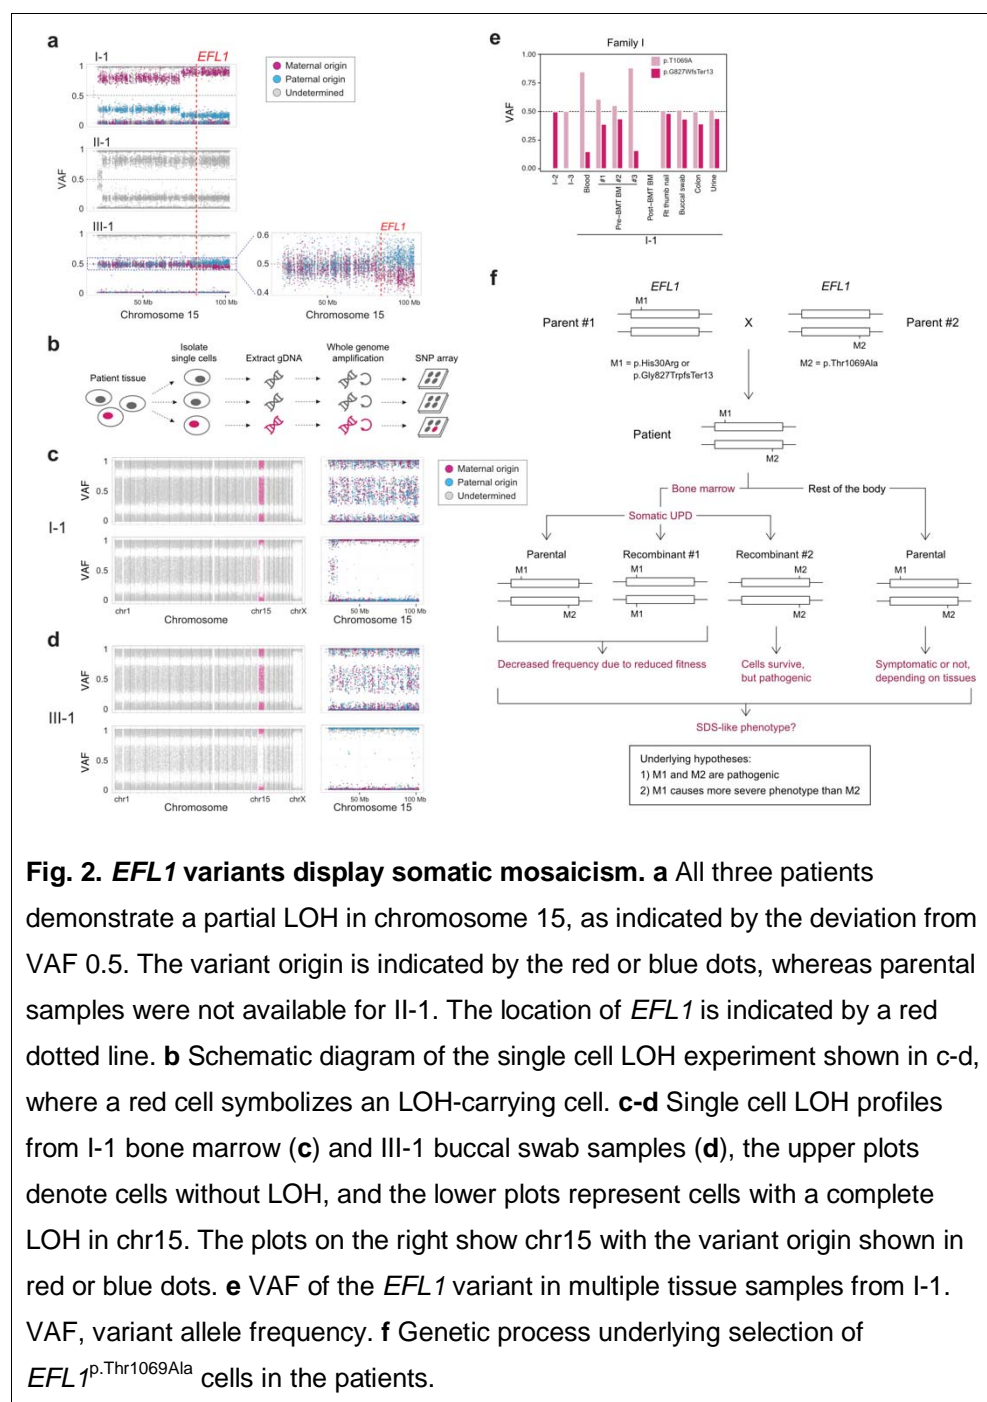

**Fig. 2. *EFL1* variants display somatic mosaicism.** **a** All three patients demonstrate a partial LOH in chromosome 15, as indicated by the deviation from VAF 0.5. The variant origin is indicated by the red or blue dots, whereas parental samples were not available for II-1. The location of *EFL1* is indicated by a red dotted line. **b** Schematic diagram of the single cell LOH experiment shown in c-d, where a red cell symbolizes an LOH-carrying cell. **c-d** Single cell LOH profiles from I-1 bone marrow (**c**) and III-1 buccal swab samples (**d**), the upper plots denote cells without LOH, and the lower plots represent cells with a complete LOH in chr15. The plots on the right show chr15 with the variant origin shown in red or blue dots. **e** VAF of the *EFL1* variant in multiple tissue samples from I-1. VAF, variant allele frequency. **f** Genetic process underlying selection of *EFL1*<sup>p.Thr1069Ala</sup> cells in the patients.

alleles. I-1 was not tested, because the sample was unavailable. Next, we checked the spatial extent of the mosaic UPD by subjecting all available tissue samples from I-1 to a high-depth amplicon sequencing analysis (>10,000X coverage depths). Variant AFs of p.Thr1069Ala in I-1 were ~0.85 in the peripheral blood and bone marrow but ~0.5 in most tissues. Conversely, AFs of p.Gly827TrpfsTer13 in the peripheral blood and bone marrow were ~0.15 and displayed complementary frequencies to those of p.Thr1069Ala (Fig. 2e). This observation suggested that the mosaic UPD was restricted at least to the bone marrow. These results were concordant with the Sanger sequencing results (Figs. S9-10). The degree of mosaicism in the bone marrow tissue changed dynamically over the time course of I-1, but did not strongly correlate with the clinical status of the patient (Fig. S11). These results suggest that compound heterozygous variants that may disable *EFL1* function and impair cell survival formed a cellular environment such that cells with (less damaging) recombinant alleles gained survival advantages over the parental ones (Fig. 2f).

### **EFL1 deficiency impairs 80S ribosome assembly**

Our interpretation of the genetic analysis assumes that the *EFL1* variants are pathogenic, and harbor a gradient of severity (Fig. 2f). More specifically, p.His30Arg possesses a comparable severity with the frameshift variant (p.Gly827TrpfsTer13), and these two are more severe than p.Thr1069Ala. To test this, we measured ribosome assembly function in the presence of

the *EFL1* variants, as EFL1 is known to mediate GTP hydrolysis-coupled release of eukaryotic translation initiation factor 6 (eIF6) together with SBDS during the maturation of the 60S ribosome subunit<sup>7,15,16</sup>. Thus, we monitored the ribosomal assembly status of the wild type, siRNA-, or CRISPR/Cas9-mediated ablation of *EFL1* (*EFL1*<sup>KD</sup> or *EFL1*<sup>-/-</sup>) in HeLa and K562 cell lines to further elucidate the molecular function of the mutant protein (Fig. 3a; Fig. S12). Polysome profiling of the *EFL1*<sup>KD</sup> and *EFL1*<sup>-/-</sup> cells showed a significantly reduced 80S peak (Fig. 3b-c; Fig. S12). This abnormal polysome profile was completely rescued after the introduction of FLAG-tagged wild type *EFL1* but not by the clones that harbored the mutations (Fig. 3b-c; Fig. S13). Interestingly, *EFL1*<sup>p.His30Arg</sup> failed to rescue the mutant phenotype, whereas *EFL1*<sup>p.Thr1069Ala</sup> displayed a moderate effect on ribosome assembly. These results indicated that EFL1 plays a crucial role in ribosome assembly, and *EFL1*<sup>p.His30Arg</sup> possesses a null function, while *EFL1*<sup>p.Thr1069Ala</sup> is hypomorphic.

## **Molecular mechanism of EFL1-mediated SDS pathogenesis**

Next, we explored the molecular function of the variants in ribosome assembly. Variant function was not mediated via phosphorylation of Thr1069, aberrant subcellular localization of EFL1, or changes in binding affinity to SBDS (Fig. S14). Next, since the release of eIF6 from 60S is a crucial step for 80S assembly and is mediated by SBDS-EFL1, we investigated eIF6 level changes by altering *EFL1*. The assessment of eIF6

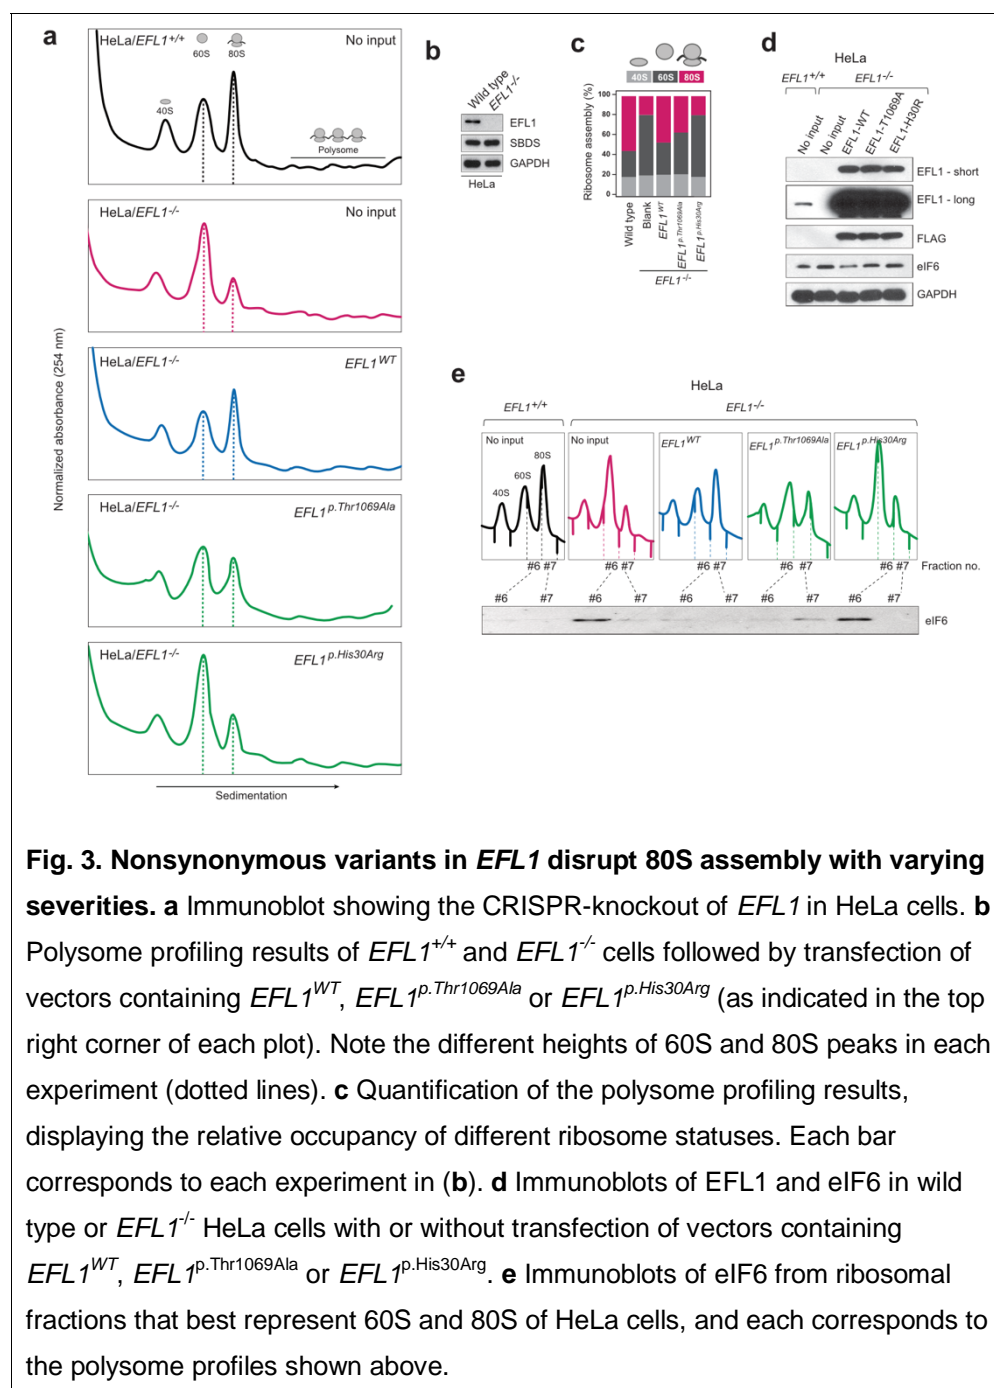

266

267 in wild type and *EFL1*<sup>-/-</sup> cells revealed that the absence of *EFL1* induced

268 eIF6 levels, which was partially rescued by the introduction of *EFL1*<sup>p.Thr1069Ala</sup>



269 or *EFL1*<sup>p.His30Arg</sup> (Fig. 3d). Immunoblot analysis of each ribosomal subunit-  
 270 bound fraction revealed that eIF6 was more highly enriched in 60S ribosome  
 271 fraction of the *EFL1*<sup>-/-</sup> cells as compared to the wild type or *EFL1*-  
 272 overexpressed cells (Fig. 3e). Remarkably, introduction of *EFL1*<sup>p.Thr1069Ala</sup>  
 273 rescued the increased eIF6 in the 60S fraction, whereas *EFL1*<sup>p.His30Arg</sup> failed  
 274 to do so (Fig. 3e; Fig. S15). Also, absence of *EFL1* caused an impaired  
 275 shuttling of cytoplasmic eIF6 back to the nucleus, consistent with the  
 276 previous observation (Fig. S16)<sup>15</sup>. This result, along with the observation  
 277 that changes in eIF6 and SBDS were not due to transcription levels (Fig.  
 278 S17), implies that the blocked exclusion of eIF6 and SBDS from the 60S  
 279 ribosomal subunit is one of the mechanisms by which our mutant protein  
 280 functions, which results in impaired 80S ribosome assembly. This result also  
 281 supports our hypothesis that the severity of p.His30Arg is higher than that of  
 282 p.Thr1069Ala.

283

## 284 **Deficiency of *EFL1* orthologs reproduces SDS phenotypes in zebrafish** 285 **and mouse models**

286 To determine whether the milder allele (*EFL1*<sup>p.Thr1069Ala</sup>) was still pathogenic  
 287 enough to cause SDS, a morpholino-targeting zebrafish model of *efl1* was  
 288 subjected to rescue experiments (Fig. S18). The *efl1* morphants had smaller  
 289 heads and eyes as well as slightly bent tails and displayed an increased  
 290 number of apoptotic cells during development (Fig. 4a). Also, primitive  
 291 erythrocytes and granulocytes were significantly reduced in the *efl1*

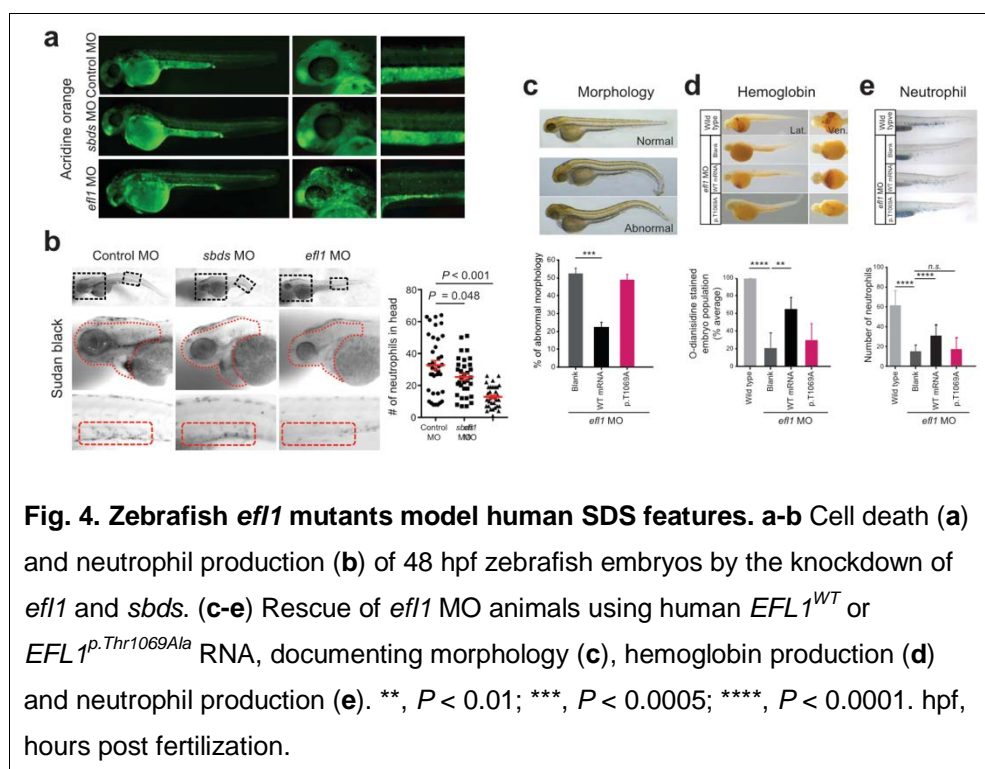

292

293 morphants, indicating impaired primitive hematopoiesis in these embryos  
 294 (Fig. 4a-b). All phenotypes were rescued by the introduction of the wild type  
 295 human *EFL1* mRNA, but less so by the *EFL1*<sup>p.Thr1069Ala</sup> mRNA (Fig. 4c-e),  
 296 confirming that the milder *efl1* allele caused SDS-like features in zebrafish.

297 In addition, mouse models were created to further investigate the  
 298 impact of *Efl1* dysfunction. *Efl1* knock-out and p.Thr1076Ala knock-in mice  
 299 (mouse Thr1076 is orthologous to human Thr1069; herein designated as  
 300 *Efl1*<sup>m</sup>) were generated and subjected to phenotypic analyses (Fig. S19).  
 301 Embryos that were homozygous for the null allele (*Efl1*<sup>-/-</sup>) were not retrieved  
 302 on embryonic day (E) 8.5, implying the essential requirement of the gene in  
 303 early embryogenesis (Fig. S19). On the other hand, mice homozygous for

the knock-in allele (*Efl1<sup>m/m</sup>*) were viable and healthy (Fig. S19), indicating a differential phenotypic tolerance between mice and humans. To model an accurate *Efl1* dose that may induce an SDS-like phenotypic expression, we inter-crossed the two strains and compared phenotypes of the compound heterozygous (CH) animals (*Efl1<sup>m/+</sup>*) to the littermates (*Efl1<sup>+/+</sup>*, *Efl1<sup>+/-</sup>* and *Efl1<sup>+m</sup>*), with an emphasis on the major SDS symptoms. The CH mice were smaller (Fig. 5a-b) and died earlier (Fig. 5c). The blood counts revealed reduced hemoglobin, white blood cells and platelets (Fig. 5d), and the bone marrow images displayed a consistent deficiency (Fig. 5e). These results validated our observation that the reduced function of the *EFL1<sup>p.Thr1069Ala</sup>* variant caused SDS in human patients. To determine whether *Efl1* expression was affected by the *Efl1<sup>m</sup>* variant, we measured the protein expression from E17.5 livers (Fig. 5f). The liver heterozygous for *Efl1<sup>m</sup>* (*Efl1<sup>+m</sup>*) showed reduced *Efl1* expression, suggesting that the variant not only reduced *Efl1* activity, but also destabilized the protein. The expression of eIF6 was also detected in the CH livers and was increased compared to the wild type livers, which was consistent with our previous observation in the HeLa cells (Fig. 5g). Ribosome profiling of the wild type and CH livers revealed that the CH livers showed a lower 80S peak compared to the wild type livers (Fig. 5h-i).

324

325

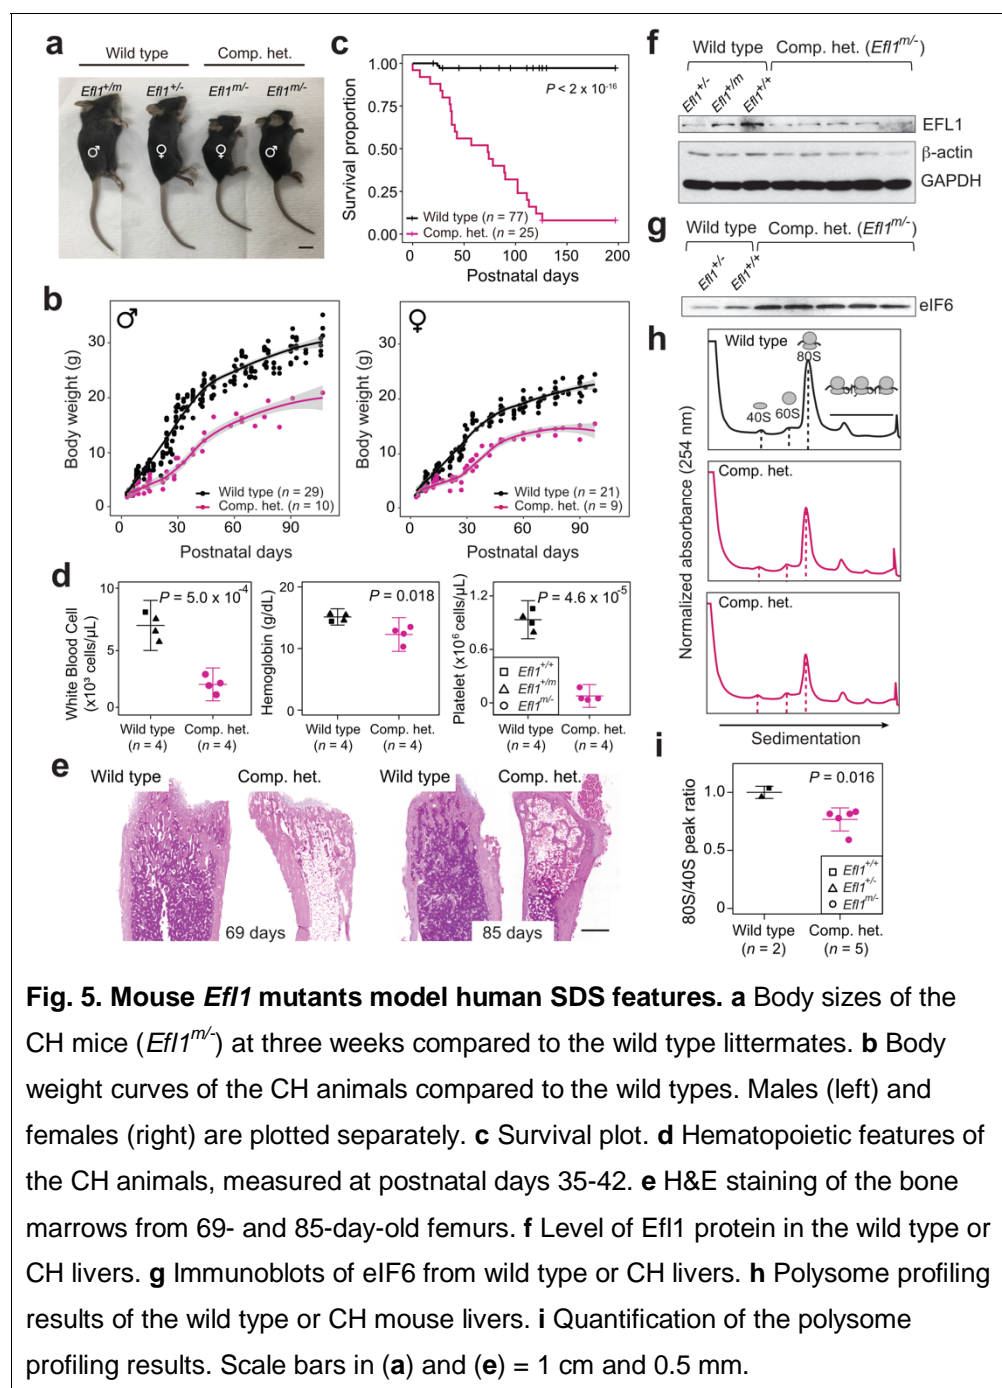

326

327

328 **Screening downstream factors of EFL1 dysfunction**

329 To further investigate the features of downstream genes that are strongly  
 330 affected by the reduced EFL1 function, we performed RNA-seq on the total  
 331 RNA, 40S-, 80S- and polysome-bound RNAs from wild type and *EFL1*<sup>-/-</sup>  
 332 K562 cells (Fig. 6a; Fig. S20). The 60S-bound RNAs were not analyzed as it  
 333 is unlikely that the large subunit will bind with RNA by itself. The 248 genes  
 334 that were decreased in the 80S-bound fraction compared to the 40S-bound  
 335 fraction in the mutant cells were extracted. A gene ontology analysis  
 336 suggests that RP genes (GO:0003735) were the major constituents of the  
 337 genes that were reduced by the absence of *EFL1* ( $P_{adj} = 5.2 \times 10^{-77}$ ,  
 338 adjusted by the Benjamini-Hochberg method; Fig. 6b-c). There was no  
 339 significantly enriched gene group in the increased gene set. The fractions of  
 340 the transcripts bound by 40S-, 80S-, or polysome differed substantially for  
 341 the RP genes in the absence of *EFL1* ( $P < 1.0 \times 10^{-13}$  for differences in both  
 342 40S- and 80S-bound transcripts, Wilcoxon signed-rank test), whereas the  
 343 *TP53* target genes and all other genes did not show such a change (Fig. 6d,  
 344  $P > 0.05$ , Wilcoxon signed-rank test). Next, we compared whether transcript  
 345 sizes (Fig. S21), expression levels, or consensus sequence elements in the  
 346 5' UTRs may serve as a factor that enabled RP-specific regulation. Notably,  
 347 highly-expressed RP transcripts with a terminal oligo-pyrimidine (TOP)  
 348 element (5'-CUUYCUUUUNS-3') were specifically altered (Fig. 6e; Fig. S22;  
 349  $P = 6.9 \times 10^{-7}$ ). This result revealed that, among all the genes in the genome,  
 350 80S ribosome assembly of RP transcripts containing a TOP element were  
 351 heavily dependent on the normal EFL1 function.

352

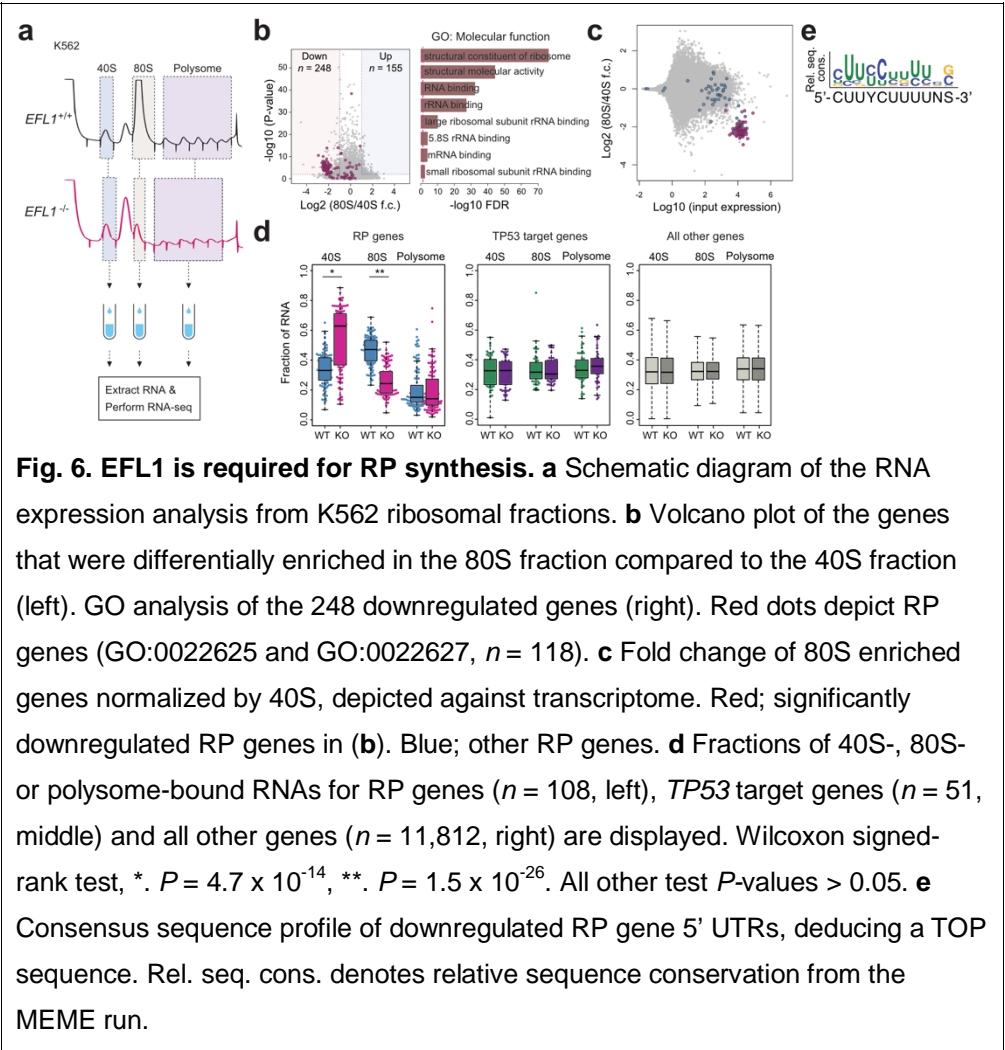

353

354

**Fig. 6. EFL1 is required for RP synthesis.** **a** Schematic diagram of the RNA expression analysis from K562 ribosomal fractions. **b** Volcano plot of the genes that were differentially enriched in the 80S fraction compared to the 40S fraction (left). GO analysis of the 248 downregulated genes (right). Red dots depict RP genes (GO:0022625 and GO:0022627, *n* = 118). **c** Fold change of 80S enriched genes normalized by 40S, depicted against transcriptome. Red; significantly downregulated RP genes in (b). Blue; other RP genes. **d** Fractions of 40S-, 80S- or polysome-bound RNAs for RP genes (*n* = 108, left), *TP53* target genes (*n* = 51, middle) and all other genes (*n* = 11,812, right) are displayed. Wilcoxon signed-rank test, \*. *P* = 4.7 × 10<sup>-14</sup>, \*\*. *P* = 1.5 × 10<sup>-26</sup>. All other test *P*-values > 0.05. **e** Consensus sequence profile of downregulated RP gene 5' UTRs, deducing a TOP sequence. Rel. seq. cons. denotes relative sequence conservation from the MEME run.

## 355 Discussion

356

357 We identified and described a unique bone marrow-specific somatic UPD  
 358 event that preferentially selects cells with *EFL1* alleles of a weaker severity.  
 359 Although other parts of the body may suffer from biallelic variants in *EFL1*,  
 360 composed of more damaging one and the milder one, the hematological  
 361 system was partially rescued by a somatic UPD resulting in a homozygous  
 362 *EFL1*<sup>p.Thr1069Ala</sup> with a weaker severity. We provided evidence suggesting that  
 363 the majority of the cells that carry *EFL1*<sup>p.Thr1069Ala</sup> in a homozygous manner is  
 364 still pathogenic. We hypothesize that a somatic UPD in the patients could  
 365 occur and be detected because of the dynamic nature of bone marrow,  
 366 where the whole stem cell can be potentially replaced by a few clones.  
 367 Indeed, the somatic UPD was not detected in other solid organs or tissues  
 368 that were available for investigation. Two lines of evidence suggest  
 369 infrequent LOH events in the *EFL1* locus in normal populations (2.7-7.7 x  
 370 10<sup>-4</sup>; see Results). The odds of having all the p.Thr1069Ala and p.His30Arg  
 371 variants and the LOH by UPD in the *EFL1* locus for one person by chance is  
 372 roughly estimated as 1 in 3 trillion, indicating that detectable UPD is not an  
 373 independent event but is associated with the biallelic *EFL1* variants. It is still  
 374 not clear if the EFL1 dysfunction somehow contributed to the occurrence of  
 375 UPD, causing the resulting clone to be expanded by positive selection.  
 376 Nevertheless, the degree of mosaicism did not seem to directly determine  
 377 clinical severity (Fig. S11). One could further delineate a more accurate

378 temporal and spatial occurrence of the event if additional clinical samples  
379 become available.

380         Several lines of evidence from our experiments suggest that  
381 although p.Thr1069Ala is the mildest among the variants that we found, it is  
382 still functional and hypomorphic: (1) the parents of patients that were  
383 heterozygous for *EFL*<sup>1<sup>p.Thr1069Ala</sup></sup> were asymptomatic, whereas the patients  
384 carried the variant in a homozygous status in their bone marrow and  
385 showed the pathology; (2) a ribosome profiling assay using a variant allele  
386 partially rescued the 80S assembly problem, whereas the wild type allele  
387 completely rescued it (Fig. 3); (3) *efl1* MO-treated zebrafish were partially  
388 rescued by the variant-containing RNA (Fig. 4); and (4) *Efl1*<sup>m/-</sup> mice  
389 displayed an SDS-like phenotype, which was of an intermediate severity  
390 relative to the *Efl1*<sup>-/-</sup> and *Efl1*<sup>+/-</sup> mice (Fig. 5). It is notable that although our  
391 mouse model successfully phenocopied most of the SDS features, the  
392 genotype was not in complete concordance with that of human patients. Our  
393 mouse model with *Efl1*<sup>m/m</sup> did not show significant phenotypes, whereas  
394 human patients with bone marrow specific homozygous *EFL*<sup>1<sup>p.Thr1069Ala</sup></sup> by  
395 somatic UPD still had hematological abnormalities such as anemia and  
396 neutropenia. This discrepancy between the two species is not rare<sup>23,24</sup>, and  
397 it again underscores differences in tolerance to a given variant, perhaps due  
398 to different physiological and genetic systems, which is critical in modeling  
399 human clinical features in mice.



Nonetheless, we demonstrated that the altered function of *EFL1* specifically influenced the translation of RP genes containing a TOP element in the 5' UTR, which led to a mechanistic mimicry of Diamond-Blackfan anemia, which is another ribosomopathy caused by insufficient RP doses<sup>25,26</sup>. The activation of TP53 is considered as a targetable downstream pathway that leads to SDS or a DBA phenotype<sup>27-29</sup>. However, our data suggest that the loss of *EFL1* does not induce TP53 activation, which is consistent with previous studies of the zebrafish *slds* model and DBA (Fig. 6d)<sup>30,31</sup>.

It is known that LARP1 directly binds to the TOP element of RP genes to repress translation in a phosphorylation-dependent manner and that mTOR partially regulates LARP1 phosphorylation<sup>32,33</sup>. To determine if we could utilize this pathway to de-repress RP translation and rescue the SDS phenotype in the animal models, we considered a molecular signaling pathway that may regulate RP gene translation through the TOP element. However, both LARP1 binding to RP TOP elements and mTOR signaling were unchanged in the mutant cells, suggesting an alternative mechanism that may regulate RP translation (data not shown).

Here, we demonstrated a mechanism by which biallelic variants of *EFL1* phenocopied classical SDS in three unrelated patients. The bone marrow-specific somatic UPD in these patients mitigated the potentially catastrophic hematological phenotype by homozygosing the less damaging variant (*EFL1*<sup>1p.Thr1069Ala</sup>). We demonstrated that defective *EFL1* caused

423      impaired 80S ribosomal assembly and that the zebrafish and mouse models  
 424      displayed similar features to humans through the alteration of 80S ribosome  
 425      assembly of RP transcripts. An extensive search of such SDS patients may  
 426      provide more insight into the development of somatic mosaicism and  
 427      subsequent molecular cascades that may lead to new avenues of treatment  
 428      for ribosomopathy.  
 429

## 430 **Materials and methods**

431

### 432 *Patient recruitment and sampling*

433 Patient enrollment and sampling were conducted under the approval of the  
434 Institutional Review Board of Seoul National University Hospital (IRB  
435 number: H-1408-014-599). Patients or their parents were provided an  
436 informed consent for genetic testing and collecting blood, buccal swab,  
437 scalp hair, urine and clipped nails. Biopsy samples of I-1 (esophagus,  
438 stomach, duodenum, colon and liver) were retrieved from the Department of  
439 Pathology of Seoul National University for a research purpose.

440

### 441 *Whole exome sequencing and variant calling*

442 Trio whole exome sequencing (WES) was performed on one family (I-1, I-2,  
443 and I-3) and singleton WES for two families (II-1 and III-1) at Theragen Etex  
444 (Suwon, Korea) using genomic DNA extracted from whole blood. Exome  
445 was captured using SeqCap EZ Exome v2 Kit (Roche Sequencing, Madison,  
446 WI) or SureSelect Human All Exon V5 (Agilent Technologies, Santa Clara,  
447 CA) and sequenced by HiSeq 2500 or HiSeq 4000 (Illumina, Inc., San Diego,  
448 CA). Paired-end sequencing was performed with read lengths of 75 or 100  
449 base pairs. The raw reads were aligned by BWA MEM software<sup>34</sup>. Variants  
450 were called by Samtools and annotated by in-house pipeline and SnpEff<sup>34-36</sup>.

451

### 452 *Single nucleus SNP microarray*

453 Nuclei of frozen bone marrow cells from I-1, where a majority of the cells  
454 were disrupted during freezing, were prepared and collected manually with a  
455 pipette under a phase-contrast microscope. Buccal swab of III-1 was  
456 resuspended in 1 ml of PBS and centrifuged at 300 g for 3 min. Supernatant  
457 was discarded and pellet was resuspended in PBS. This suspension was  
458 moved to a 100 ml cell culture dish. Single cells were manually picked up  
459 with a pipette under a phase-contrast microscope. These single cells or  
460 nuclei were whole-genome amplified by a REPLI-g Single Cell Kit (Qiagen,  
461 Venlo, the Netherlands) for 3 hours. Amplified genomes were genotyped by  
462 Infinium<sup>®</sup> OmniExpress-24 v1.2 (Illumina, Inc.).

463

#### 464 *Sample-barcoded amplicon sequencing*

465 Genomic DNAs extracted from multiple individuals and tissues were PCR  
466 amplified with primers shown in Table S6, with following condition: 3 min at  
467 95°C, followed by 20 cycles (30 sec at 95°C, 30 sec at 57°C, and 20 sec at  
468 72°C), and a final extension at 5 min at 72°C. Barcoded PCRs were  
469 performed with 1 µl of first PCR product as templates using tissue-specific  
470 barcoded primers (Table S7). Same reverse, forward and reverse primers of  
471 *EFL1*, *WDR76* and rs1044032 with Sanger sequencing were used for  
472 barcoded PCR products, respectively. The second PCR condition was: 3  
473 min at 95°C, followed by 20 cycles (30 sec at 95°C, 30 sec at 57°C, and 20  
474 sec at 72°C), and a final extension at 5 min at 72°C.

475

# 476    *Molecular dynamics (MD) simulation of EFL1*

477    The initial atom coordinates for MD simulations were from the Protein Data  
 478    Bank accession number 5ANC <sup>7</sup>. Input files were prepared with PSFGEN,  
 479    SOLVATE, and IONIZE plug-ins of VMD <sup>37</sup>. Each simulation used explicit  
 480    TIP3 solvent and periodic boundaries. Each unit cell contained one  
 481    molecule of the entire preinitiation complex. The unit cells were ~210 Å x  
 482    180 Å x 190 Å in size and contained ~700,000 atoms. Sodium and chloride  
 483    were added to make the total ionic strength 100 mM. MD simulations were  
 484    performed in triplicate (each 50 ns in length) with a CHARMM36 force field  
 485    <sup>38</sup> using NAMD2 <sup>39</sup> on the Bebop cluster of the Laboratory Computing  
 486    Resource Center at Argonne National Laboratory. MD simulations were run  
 487    at P = 1 atm, T = 310 K, with a 1 fs integration time and a 12 Å cutoff  
 488    distance. Nonbonded forces were calculated every two steps and  
 489    electrostatic forces were calculated every four. Pressure and temperature  
 490    were maintained using a Langevin piston and bath. Atom coordinates were  
 491    recorded every 10 ps. MD trajectories were visualized and analyzed with  
 492    VMD and PyMol.

493

# 494    *Polysome profiling*

495    To maintain the binding of mRNA to ribosome subunits, cycloheximide  
 496    (Sigma-Aldrich, St. Louis, MO) (100 ug/ml) was added to cell culture media  
 497    and incubated for 10 min at 37°C. After incubation, cells were washed with  
 498    cold PBS including cycloheximide (10 ug/ml) twice, then lysed with 1 ml of

499 polysome lysis buffer (20 mM HEPES pH 7.6, 5 mM MgCl<sub>2</sub>, 125 mM KCl, 1%  
500 NP-40, 2 mM DTT) supplemented with cycloheximide (100 ug/ml), protease  
501 inhibitor cocktail (EDTA-free; Roche) and RNase inhibitor (Invitrogen,  
502 Carlsbad, CA) on ice. Cell lysates were tumbled for 20 min at 4°C and  
503 centrifuged at 13,200 rpm for 20 min. The supernatants were fractionated in  
504 17.5-50% linear sucrose gradients by ultracentrifugation (35,000 rpm for 160  
505 min) in a Beckman ultracentrifuge using SW41-Ti rotor. Gradients were  
506 eluted with a gradient fractionator (Brandel, Gaithersburg, MD) and  
507 monitored with a UA-5 detector (ISCO). Equal volume of each polysome  
508 fraction was used for determining the level of eIF6 by Western blot analysis.

509

510 RNA sequencing from polysome fractions

511 RNA was extracted from polysome fractionation. RNA sequencing library  
512 was constructed using a TruSeq stranded total RNA kit (Illumina Inc.) with  
513 rRNA depletion. 100 bp paired-end sequencing was performed using HiSeq  
514 2500, producing >5 Gb for each sample. Transcripts with polysome-bound  
515 RNA count >10 were selected and subjected to calculation of fractions of  
516 40S-, 80S- or polysome-bound RNA molecules for a given gene.

517

518 *Zebrafish experiments*

519 Zebrafish embryos were co-injected with *efl1* morpholino (MO) and normal  
520 or mutated human *EFL1* mRNA at 1-2 cell stage. To evaluate the rescue  
521 efficacy of each co-injected *EFL1* mRNA, the number of neutrophils and

522 primary erythrocytes were assessed. For neutrophils, individual Sudan  
523 Black stained cells in the caudal region of the embryo, posterior to the anal  
524 opening, were counted and the absolute number of positive cells were used  
525 for phenotypic comparison. For primary erythrocytes, the degree of o-  
526 dianisidine staining was qualitatively compared using the percentage of o-  
527 dianisidine stained embryos within the population, since it is not technically  
528 possible to count individual erythrocytes.

529

### 530 *Efl1* mutant mouse strain construction, maintenance and experiments

531 All the mouse experiments were performed under the standard protocols  
532 approved by IACUC (#17-0148-S1A0). *Efl1* knock-out (*Efl1*<sup>-</sup>) strain was  
533 constructed by introducing a 10-base deletion in the 10<sup>th</sup> exon of the gene in  
534 C57BL6/J strain using CRISPR/Cas9 system in Macrogen (Seoul, Korea).  
535 One cell embryos were microinjected with two sgRNAs (5'-  
536 ACTTCTTTAGGATTAAAAATTGG-3' and 5'-  
537 CCGAGGACAGCGTGGGATATGGG-3') and Cas9 protein mixture,  
538 incubated and transplanted into pseudopregnant recipient ICR mice. *Efl1*  
539 knock-in (*Efl1*<sup>p.Thr1076Ala</sup>) variant was generated in C57BL6/J in University of  
540 Utah Mutation Generation and Analysis Core using two sgRNAs (5'-  
541 GTTCTGGGTGCCGACCACGG-3' and 5'-GTGCAGGTACTCCTCCTCCG-  
542 3') and in the presence of oligodeoxynucleotides which includes the  
543 ACC>GCC change mimicking the p.Thr1069Ala and an *Mbol* site for  
544 genotyping. Genotyping strategies of the wild type and mutant alleles are

545 described in supplemental Methods. For phenotypic evaluations, wild type  
 546 and mutant mice from the same litter were sacrificed and dissected for  
 547 peripheral blood extraction, pancreas pathology and skeletal structure  
 548 analysis. 300 ul of peripheral blood was extracted from 35-42-day animals  
 549 and subjected to a complete blood count and differential tests.  
 550



## 551 **Author contributions**

552 M. Choi, H.J. Kang, and H.H. Kim conceived the study. S. Lee and M. Choi  
553 performed genetic analysis and statistical evaluations. C.H. Shin, S. Lee,  
554 S.D. Jeong, H.H. Kim, J. Lee, and M. Choi performed molecular biology and  
555 biochemistry experiments and assessed the results. J. Lee, S. Lee, S.J. Son,  
556 M. Choi, and J.K. Seong performed mouse experiments. J.-D. Kim, A.-R.  
557 Kim, and S.-W. Jin performed zebrafish experiments. C.R. Hong, J.S. Ko,  
558 Y.B. Sohn, O.-H. Kim, J.M. Ko, T.-J. Cho, and H.J. Kang provided patient  
559 care and generated clinical data. N.T. Wright, O. Kokhan, and T. Yoo  
560 analyzed protein structure. M. Choi, S. Lee, C.H. Shin, C.R. Hong, J. Lee,  
561 H.J. Kang, and H.H. Kim wrote the manuscript. All authors approved the  
562 final version of the manuscript.

563

## 564 **Acknowledgements**

565 We appreciate the patients and families that participated in this study. We  
566 thank Jung-Ah Kim and Hyoung-Jin Kim at Seoul National University  
567 Hospital for collecting and interpreting hematological data and for  
568 interpreting images. We thank the University of Utah Mutation Generation  
569 and Detection Core for construction of the *Efl1* knock-in mice. This study  
570 was partly supported by grants from the National Research Foundation of  
571 Korea (2014M3C9A2064686, 2019R1A2C2010789 to M.C. and  
572 2017R1A2A2A05069691 to H.H.K.) and National Science Foundation (REU  
573 CHE-1062629 and RUI MCB-1607024) awards to N.T.W.. This research

574 was partly supported by Korea Mouse Phenotyping Project  
 575 (2013M3A9D5072550) of the Ministry of Science, ICT and Future Planning  
 576 through the National Research Foundation. OK gratefully acknowledges the  
 577 computing resources provided by Bebop, a high-performance computing  
 578 cluster operated by the Laboratory Computing Resource Center at Argonne  
 579 National Laboratory. The authors declare no competing financial interests.

580

581 **Abbreviations used:** CH, compound heterozygous; DBA, Diamond-  
 582 Blackfan anemia; LOH, loss of heterozygosity; RP, ribosomal protein; SDS,  
 583 Schwachman-Diamond syndrome; TOP, terminal oligo-pyrimidine; UPD,  
 584 uniparental disomy; VUS, variants of unknown significances.

585

586 **Table 1. Coverage depths and allele frequencies of *EFL1* variants**

| Patient | Variant in <i>EFL1</i> (M: maternal origin, P: paternal, or U: unknown) | Method        | Allele coverage depths (ref. allele:non-ref. allele) (% non-ref. allele) |                         |                         | AF in gnomAD           |                        |
|---------|-------------------------------------------------------------------------|---------------|--------------------------------------------------------------------------|-------------------------|-------------------------|------------------------|------------------------|
|         |                                                                         |               | Patient                                                                  | Mother                  | Father                  | Overall                | East Asian             |
| I-1     | p.Thr1069Ala (M)                                                        | WES           | 10:64 (86.5%)                                                            | 39:40 (50.1%)           | 33:0 (0%)               | 3.2 x 10 <sup>-5</sup> | 1.7 x 10 <sup>-4</sup> |
|         |                                                                         | Amplicon seq. | 23,914:131,714 (84.6%)                                                   | 63,582:63,954 (50.1%)   | 121,502:507 (0.4%)      |                        |                        |
|         | p.Gly827TrpfsTer13 (P)                                                  | WES           | 22:2 (8.3%)                                                              | 27:0 (0%)               | 9:14 (60.9%)            | 0                      | 0                      |
|         |                                                                         | Amplicon seq. | 243,610:43,042 (15.0%)                                                   | 505,158:74 (0.01%)      | 221,532:218,976 (49.7%) |                        |                        |
| II-1    | p.Thr1069Ala (U)                                                        | WES           | 15:59 (79.7%)                                                            | N/A                     | N/A                     | 3.2 x 10 <sup>-5</sup> | 1.7 x 10 <sup>-4</sup> |
|         | p.His30Arg (U)                                                          | WES           | 127:22 (14.8%)                                                           | N/A                     | N/A                     | 1.8 x 10 <sup>-5</sup> | 5.1 x 10 <sup>-5</sup> |
| III-1   | p.Thr1069Ala (P)                                                        | WES           | 43:30 (41.1%)                                                            | N/A                     | N/A                     | 3.2 x 10 <sup>-5</sup> | 1.7 x 10 <sup>-4</sup> |
|         |                                                                         | Amplicon seq. | 135,196:149,160 (52.5%)                                                  | 189,517:1,786 (0.9%)    | 87,347:85,317 (49.4%)   |                        |                        |
|         | p.His30Arg (M)                                                          | WES           | 74:43 (36.8%)                                                            | N/A                     | N/A                     | 1.8 x 10 <sup>-5</sup> | 5.1 x 10 <sup>-5</sup> |
|         |                                                                         | Amplicon seq. | 25,316:22,680 (47.3%)                                                    | 119,382:121,508 (50.4%) | 41,684:76 (0.2%)        |                        |                        |

587

## 588      **References**

- 589      1      Boocock, G. R. *et al.* Mutations in SBDS are associated with  
590              Shwachman-Diamond syndrome. *Nat Genet* **33**, 97-101,  
591              doi:10.1038/ng1062 (2003).
- 592      2      Shimamura, A. Shwachman-Diamond syndrome. *Semin Hematol* **43**,  
593              178-188, doi:10.1053/j.seminhematol.2006.04.006 (2006).
- 594      3      Dror, Y. *et al.* Draft consensus guidelines for diagnosis and treatment  
595              of Shwachman-Diamond syndrome. *Ann N Y Acad Sci* **1242**, 40-55,  
596              doi:10.1111/j.1749-6632.2011.06349.x (2011).
- 597      4      Kuijpers, T. W. *et al.* Hematologic abnormalities in Shwachman  
598              Diamond syndrome: lack of genotype-phenotype relationship. *Blood*  
599              **106**, 356-361, doi:10.1182/blood-2004-11-4371 (2005).
- 600      5      Dror, Y. & Freedman, M. H. Shwachman-Diamond syndrome: An  
601              inherited preleukemic bone marrow failure disorder with aberrant  
602              hematopoietic progenitors and faulty marrow microenvironment.  
603              *Blood* **94**, 3048-3054 (1999).
- 604      6      Hashmi, S. K. *et al.* Comparative analysis of Shwachman-Diamond  
605              syndrome to other inherited bone marrow failure syndromes and  
606              genotype-phenotype correlation. *Clin Genet* **79**, 448-458,  
607              doi:10.1111/j.1399-0004.2010.01468.x (2011).
- 608      7      Weis, F. *et al.* Mechanism of eIF6 release from the nascent 60S  
609              ribosomal subunit. *Nat Struct Mol Biol* **22**, 914-919,  
610              doi:10.1038/nsmb.3112 (2015).
- 611      8      Menne, T. F. *et al.* The Shwachman-Bodian-Diamond syndrome  
612              protein mediates translational activation of ribosomes in yeast. *Nat*  
613              *Genet* **39**, 486-495, doi:10.1038/ng1994 (2007).
- 614      9      Narla, A. & Ebert, B. L. Ribosomopathies: human disorders of  
615              ribosome dysfunction. *Blood* **115**, 3196-3205, doi:10.1182/blood-  
616              2009-10-178129 (2010).
- 617      10      Tan, Q. K. *et al.* Further evidence for the involvement of EFL1 in a  
618              Shwachman-Diamond-like syndrome and expansion of the  
619              phenotypic features. *Cold Spring Harb Mol Case Stud* **4**,  
620              doi:10.1101/mcs.a003046 (2018).
- 621      11      Stepensky, P. *et al.* Mutations in EFL1, an SBDS partner, are  
622              associated with infantile pancytopenia, exocrine pancreatic  
623              insufficiency and skeletal anomalies in a Shwachman-Diamond like  
624              syndrome. *J Med Genet* **54**, 558-566, doi:10.1136/jmedgenet-2016-  
625              104366 (2017).
- 626      12      Tummala, H. *et al.* DNAJC21 Mutations Link a Cancer-Prone Bone  
627              Marrow Failure Syndrome to Corruption in 60S Ribosome Subunit  
628              Maturation. *Am J Hum Genet* **99**, 115-124,  
629              doi:10.1016/j.ajhg.2016.05.002 (2016).
- 630      13      Dhanraj, S. *et al.* Biallelic mutations in DNAJC21 cause  
631              Shwachman-Diamond syndrome. *Blood* **129**, 1557-1562,  
632              doi:10.1182/blood-2016-08-735431 (2017).

633 14 Carapito, R. *et al.* Mutations in signal recognition particle SRP54  
634 cause syndromic neutropenia with Shwachman-Diamond-like  
635 features. *J Clin Invest* **127**, 4090-4103, doi:10.1172/JCI92876 (2017).  
636 15 Tan, S. *et al.* EFL1 mutations impair eIF6 release to cause  
637 Shwachman-Diamond syndrome. *Blood* **134**, 277-290,  
638 doi:10.1182/blood.2018893404 (2019).  
639 16 Finch, A. J. *et al.* Uncoupling of GTP hydrolysis from eIF6 release on  
640 the ribosome causes Shwachman-Diamond syndrome. *Genes Dev*  
641 **25**, 917-929, doi:10.1101/gad.623011 (2011).  
642 17 Chase, A. *et al.* PRR14L mutations are associated with chromosome  
643 22 acquired uniparental disomy, age-related clonal hematopoiesis  
644 and myeloid neoplasia. *Leukemia* **33**, 1184-1194,  
645 doi:10.1038/s41375-018-0340-5 (2019).  
646 18 Dubois, V. *et al.* Pretransplant HLA mistyping in diagnostic samples  
647 of acute myeloid leukemia patients due to acquired uniparental  
648 disomy. *Leukemia* **26**, 2079-2085, doi:10.1038/leu.2012.68 (2012).  
649 19 Roberts, J. L. *et al.* CD45-deficient severe combined  
650 immunodeficiency caused by uniparental disomy. *Proc Natl Acad Sci*  
651 *U S A* **109**, 10456-10461, doi:10.1073/pnas.1202249109 (2012).  
652 20 Swensen, J. J. *et al.* Sickle cell disease resulting from uniparental  
653 disomy in a child who inherited sickle cell trait. *Blood* **116**, 2822-2825,  
654 doi:10.1182/blood-2010-05-284331 (2010).  
655 21 Lek, M. *et al.* Analysis of protein-coding genetic variation in 60,706  
656 humans. *Nature* **536**, 285-291, doi:10.1038/nature19057 (2016).  
657 22 Loh, P. R. *et al.* Insights into clonal haematopoiesis from 8,342  
658 mosaic chromosomal alterations. *Nature* **559**, 350-355,  
659 doi:10.1038/s41586-018-0321-x (2018).  
660 23 el-Amraoui, A. *et al.* Human Usher 1B/mouse shaker-1: the retinal  
661 phenotype discrepancy explained by the presence/absence of  
662 myosin VIIA in the photoreceptor cells. *Hum Mol Genet* **5**, 1171-1178,  
663 doi:10.1093/hmg/5.8.1171 (1996).  
664 24 Liao, B. Y. & Zhang, J. Null mutations in human and mouse orthologs  
665 frequently result in different phenotypes. *Proc Natl Acad Sci U S A*  
666 **105**, 6987-6992, doi:10.1073/pnas.0800387105 (2008).  
667 25 Draptchinskaia, N. *et al.* The gene encoding ribosomal protein S19 is  
668 mutated in Diamond-Blackfan anaemia. *Nat Genet* **21**, 169-175,  
669 doi:10.1038/5951 (1999).  
670 26 Khajuria, R. K. *et al.* Ribosome Levels Selectively Regulate  
671 Translation and Lineage Commitment in Human Hematopoiesis. *Cell*  
672 **173**, 90-103 e119, doi:10.1016/j.cell.2018.02.036 (2018).  
673 27 Danilova, N., Sakamoto, K. M. & Lin, S. Ribosomal protein S19  
674 deficiency in zebrafish leads to developmental abnormalities and  
675 defective erythropoiesis through activation of p53 protein family.  
676 *Blood* **112**, 5228-5237, doi:10.1182/blood-2008-01-132290 (2008).  
677 28 McGowan, K. A. *et al.* Ribosomal mutations cause p53-mediated  
678 dark skin and pleiotropic effects. *Nat Genet* **40**, 963-970,

doi:10.1038/ng.188 (2008).

29 Elghetany, M. T. & Alter, B. P. p53 protein overexpression in bone marrow biopsies of patients with Shwachman-Diamond syndrome has a prevalence similar to that of patients with refractory anemia. *Arch Pathol Lab Med* **126**, 452-455, doi:10.1043/0003-9985(2002)126<0452:PPOIBM>2.0.CO;2 (2002).

30 Provost, E. *et al.* Ribosomal biogenesis genes play an essential and p53-independent role in zebrafish pancreas development. *Development* **139**, 3232-3241, doi:10.1242/dev.077107 (2012).

31 Ludwig, L. S. *et al.* Altered translation of GATA1 in Diamond-Blackfan anemia. *Nat Med* **20**, 748-753, doi:10.1038/nm.3557 (2014).

32 Tcherkezian, J. *et al.* Proteomic analysis of cap-dependent translation identifies LARP1 as a key regulator of 5'TOP mRNA translation. *Genes Dev* **28**, 357-371, doi:10.1101/gad.231407.113 (2014).

33 Fonseca, B. D. *et al.* La-related Protein 1 (LARP1) Represses Terminal Oligopyrimidine (TOP) mRNA Translation Downstream of mTOR Complex 1 (mTORC1). *J Biol Chem* **290**, 15996-16020, doi:10.1074/jbc.M114.621730 (2015).

34 Li, H. & Durbin, R. Fast and accurate long-read alignment with Burrows-Wheeler transform. *Bioinformatics* **26**, 589-595, doi:10.1093/bioinformatics/btp698 (2010).

35 Li, H. *et al.* The Sequence Alignment/Map format and SAMtools. *Bioinformatics* **25**, 2078-2079, doi:10.1093/bioinformatics/btp352 (2009).

36 Cingolani, P. *et al.* A program for annotating and predicting the effects of single nucleotide polymorphisms, SnpEff: SNPs in the genome of *Drosophila melanogaster* strain w1118; iso-2; iso-3. *Fly (Austin)* **6**, 80-92, doi:10.4161/fly.19695 (2012).

37 Humphrey, W., Dalke, A. & Schulten, K. VMD: visual molecular dynamics. *J Mol Graph* **14**, 33-38, 27-38, doi:10.1016/0263-7855(96)00018-5 (1996).

38 Best, R. B. *et al.* Optimization of the additive CHARMM all-atom protein force field targeting improved sampling of the backbone phi, psi and side-chain chi(1) and chi(2) dihedral angles. *J Chem Theory Comput* **8**, 3257-3273, doi:10.1021/ct300400x (2012).

39 Phillips, J. C. *et al.* Scalable molecular dynamics with NAMD. *J Comput Chem* **26**, 1781-1802, doi:10.1002/jcc.20289 (2005).

718
